# Supplementary material for: Evaluation of on-site calibration procedures for SKYNET Prede POM sun–sky photometers
Source: Copernicus journal article supplement (doi:10.5194/amt-17-5029-2024), 2024-09-03
Supplement: Supplementary file 1 [file amt-17-5029-2024-supplement.pdf]

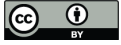

*Supplement of*

## **Evaluation of on-site calibration procedures for SKYNET Prede POM sun–sky photometers**

**Monica Campanelli et al.**

*Correspondence to:* Monica Campanelli (m.campanelli@isac.cnr.it)

The copyright of individual parts of the supplement might differ from the article licence.

POM\_CNR VO\_IL\*e-04 (A)

%CV

Unc

| Yymm       | 340 | 400    | 500    | 675    | 870    | 1020   | 340    | 400 | 500 | 675 | 870 | 1020 | 340 | 400        | 500        | 675        | 870        | 1020       |
|------------|-----|--------|--------|--------|--------|--------|--------|-----|-----|-----|-----|------|-----|------------|------------|------------|------------|------------|
| Davos 1708 | IL  | 1.363  | 2.828  | 3.486  | 2.229  | 1.164  |        | 2.6 | 1.9 | 1.2 | 1.0 | 1.3  |     | 3.5847E-06 | 5.2884E-06 | 4.3226E-06 | 2.3182E-06 | 1.4899E-06 |
|            | XIL | 1.3411 | 2.8384 | 3.5466 | 2.2336 | 1.1984 |        | 4.1 | 2.4 | 3.1 | 1.8 | 4.3  |     | 5.4430E-06 | 6.8334E-06 | 1.0821E-05 | 3.8981E-06 | 5.1719E-06 |
|            | PFR |        | 2.844  |        | 2.231  |        |        |     | 0.2 |     | 0.3 |      |     |            | 6.126E-07  |            | 5.933E-07  |            |
| Rome 1710  | IL  | 1.307  | 2.782  | 3.454  | 2.204  | 1.151  |        | 2.2 | 1.3 | 0.7 | 0.9 | 1.5  |     | 2.8754E-06 | 3.5888E-06 | 2.4523E-06 | 1.8734E-06 | 1.7035E-06 |
|            | XIL | 1.3101 | 2.7803 | 3.4634 | 2.2171 | 1.1417 |        | 6.1 | 2.2 | 1.3 | 0.8 | 1.2  |     | 7.9275E-06 | 6.0121E-06 | 4.5426E-06 | 1.7925E-06 | 1.3215E-06 |
|            | PFR |        | 2.858  |        | 2.226  |        |        |     | 0.1 |     | 0.2 |      |     |            | 3.043E-07  |            | 4.266E-07  |            |
| Davos 1807 | IL  | 0.0886 | 1.289  | 2.751  | 3.268  | 2.3    | 1.236  | 0.8 | 0.7 | 0.4 | 0.2 | 0.4  | 1.0 | 6.8245E-08 | 9.1519E-07 | 6.2092E-07 | 8.28E-07   | 1.2484E-06 |
|            | XIL | 0.0896 | 1.3061 | 2.7756 | 3.284  | 2.3203 |        | 1.7 | 1.5 | 0.7 | 0.7 |      |     | 1.4809E-07 | 2.0023E-06 | 2.3990E-06 | 1.5773E-06 |            |
|            | PFR |        | 2.781  |        | 2.325  |        |        |     | 0.3 |     | 0.2 |      |     |            | 6.948E-07  |            | 4.221E-07  |            |
| Davos 1808 | IL  | 0.0888 | 1.3    | 2.762  | 3.294  | 2.321  | 1.228  | 1.4 | 1.3 | 0.9 | 1.0 | 0.5  |     | 1.2438E-07 | 1.6900E-06 | 2.7999E-06 | 2.2514E-06 | 6.3856E-07 |
|            | XIL | 0.0889 | 1.3045 | 2.788  | 3.3126 | 2.3282 | 1.2396 | 3.4 | 2.2 | 1.3 | 0.9 | 0.9  |     | 2.9799E-07 | 3.7027E-06 | 4.2749E-06 | 2.0167E-06 | 1.0606E-06 |
|            | PFR |        | 2.799  |        | 2.349  |        |        |     | 0.5 |     | 0.9 |      |     |            | 1.410E-0   |            | 2.204E-06  |            |
| Davos 1809 | IL  | 0.0888 | 1.298  | 2.771  | 3.312  | 2.343  | 1.24   | 1.4 | 0.7 | 0.4 | 0.2 | 0.6  |     | 1.217E-07  | 9.6052E-07 | 5.9616E-07 | 4.686E-07  | 7.44E-07   |
|            | XIL | 0.0897 | 1.3065 | 2.7897 | 3.3606 | 2.3744 | 1.2379 | 3.4 | 1.7 | 1.5 | 2.2 | 0.5  |     | 3.0721E-07 | 2.1913E-06 | 7.2794E-06 | 2.7935E-06 | 6.2217E-07 |
|            | PFR |        | 2.801  |        | 2.368  |        |        |     | 0.2 |     | 0.4 |      |     |            | 5.387E-07  |            | 1.017E-06  |            |
| Davos 1810 | IL  | 0.0881 | 1.286  | 2.766  | 3.317  | 2.346  | 1.259  | 0.7 | 0.5 | 0.3 | 0.1 | 0.4  | 0.8 | 6.4298E-08 | 6.8158E-07 | 3.317E-07  | 8.4456E-07 | 1.0576E-06 |
|            | XIL | 0.0892 | 1.3025 | 2.7791 | 3.306  | 2.3561 |        | 1.0 | 1.1 | 0.5 | 0.4 | 0.2  |     | 8.9976E-08 | 1.4159E-06 | 1.3825E-06 | 5.7300E-07 |            |
|            | PFR |        | 2.802  |        | 2.364  |        |        |     | 0.1 |     | 0.2 |      |     |            | 3.842E-07  |            | 3.991E-07  |            |
| Rome 1905  | IL  | 0.0857 | 1.274  | 2.717  | 3.268  | 2.321  | 1.235  | 1.2 | 1.1 | 0.6 | 0.5 | 1.8  | 1.2 | 1.0542E-07 | 1.4014E-06 | 1.7647E-06 | 4.201E-06  | 1.445E-06  |
|            | XIL | 0.0877 | 1.3061 | 2.7466 | 3.2535 | 2.2858 | 1.2063 | 3.1 | 4.8 | 1.3 | 2.3 | 2.2  | 2.2 | 2.7478E-07 | 6.2097E-06 | 7.4567E-06 | 7.9489E-06 | 2.6940E-06 |
|            | PFR |        | 2.804  |        | 2.348  |        |        |     | 0.6 |     | 0.6 |      |     |            | 1.552E-06  |            | 1.280E-06  |            |
| Rome 1906  | IL  | 0.0852 | 1.269  | 2.73   | 3.272  | 2.303  | 1.228  | 0.5 | 0.7 | 0.7 | 0.7 | 0.5  |     | 4.3467E-08 | 8.3754E-07 | 2.2577E-06 | 1.6121E-06 | 5.8944E-07 |
|            | XIL | 0.0865 | 1.2875 | 2.7762 | 3.3197 | 2.3329 | 1.2497 | 4.6 | 2.2 | 2.2 | 2.3 | 2.6  |     | 3.9447E-07 | 2.7702E-06 | 7.7213E-06 | 4.6677E-06 | 3.3028E-06 |
|            | PFR |        | 2.809  |        | 2.347  |        |        |     | 0.7 |     | 0.5 |      |     |            | 1.909E-06  |            | 1.144E-06  |            |
| Rome 1907  | IL  | 0.0841 | 1.261  | 2.737  | 3.257  | 2.299  | 1.231  | 1.7 | 1.6 | 1.1 | 0.5 | 0.4  | 0.3 | 1.4043E-07 | 2.0302E-06 | 1.5308E-06 | 8.5063E-07 | 3.2006E-07 |
|            | XIL | 0.0859 | 1.2938 | 2.7704 | 3.3159 | 2.3329 | 1.246  | 3.1 | 2.8 | 1.7 | 1.7 | 1.0  |     | 2.6246E-07 | 3.6563E-06 | 5.6785E-06 | 2.9061E-06 | 1.2319E-06 |
|            | PFR |        | 2.836  |        | 2.366  |        |        |     | 0.2 |     | 0.2 |      |     |            | 5.946E-07  |            | 3.893E-07  |            |
| Rome 1908  | IL  | 0.0847 | 1.278  | 2.765  | 3.324  | 2.329  | 1.25   | 0.9 | 0.7 | 0.4 | 0.2 | 0.2  | 0.3 | 7.8752E-08 | 8.6904E-07 | 1.106E-06  | 4.1922E-07 | 4.25E-07   |
|            | XIL | 0.0862 | 1.298  | 2.7833 | 3.3328 | 2.3305 | 1.25   | 3.0 | 3.3 | 1.5 | 1.4 | 1.1  |     | 2.5662E-07 | 4.3291E-06 | 4.5499E-06 | 2.2329E-06 | 1.3820E-06 |
|            | PFR |        | 2.834  |        | 2.369  |        |        |     | 0.6 |     | 0.3 |      |     |            | 1.559E-06  |            | 5.794E-07  |            |

|               |          |        |        |        |        |        |        |     |     |     |     |     |     |            |            |            |            |            |            |
|---------------|----------|--------|--------|--------|--------|--------|--------|-----|-----|-----|-----|-----|-----|------------|------------|------------|------------|------------|------------|
| Rome<br>1909  | IL       | 0.0841 | 1.26   | 2.747  | 3.315  | 2.32   | 1.246  | 2.3 | 1.6 | 1.0 | 0.6 | 0.5 | 0.4 | 1.9675E-07 | 2.0538E-06 | 2.637E-06  | 2.055E-06  | 1.0904E-06 | 5.3578E-07 |
|               | XIL      | 0.0866 | 1.309  | 2.823  | 3.3463 | 2.3356 | 1.2564 | 4.0 | 3.6 | 2.9 | 1.9 | 1.1 | 1.0 | 3.4160E-07 | 4.7260E-06 | 8.0981E-06 | 6.3714E-06 | 2.5963E-06 | 1.1914E-06 |
|               | PFR      |        |        | 2.838  |        | 2.369  |        |     |     | 0.1 |     | 0.1 |     |            |            | 3.260E-07  |            | 1.754E-07  |            |
| Rome<br>2108  | IL       | 1.251  | 1.251  | 2.716  | 3.301  | 2.259  | 1.266  | 2.7 | 2.7 | 2.5 | 2.6 | 0.3 | 0.3 |            | 3.3402E-06 | 6.709E-06  | 8.616E-06  | 6.3252E-07 | 3.9246E-07 |
|               | XIL      | 0.0854 | 1.2788 | 2.7291 | 3.2931 | 2.2788 | 1.2458 | 2.8 | 3.3 | 2.5 | 1.7 | 1.5 | 0.9 | 2.3456E-07 | 4.1561E-06 | 6.7215E-06 | 5.4234E-06 | 3.3797E-06 | 1.1382E-06 |
|               | IL       | 0.0818 | 1.232  | 2.686  | 3.268  | 2.25   | 1.25   | 1.2 | 1.4 | 0.6 | 0.5 | 0.5 | 0.4 | 1.006E-03  | 1.663E-02  | 1.638E-02  | 1.699E-02  | 1.215E-02  | 4.875E-03  |
| Rome<br>2109  | XIL      | 0.083  | 1.251  | 2.7016 | 3.2964 | 2.2847 | 1.2526 | 2.2 | 2.7 | 2.3 | 2.9 | 3.0 | 2.5 | 1.8048E-07 | 3.4187E-06 | 6.1926E-06 | 9.4722E-06 | 6.8267E-06 | 3.1340E-06 |
|               | PFR      |        |        | 2.754  |        | 2.302  |        |     |     | 0.2 |     | 0.4 |     |            |            | 6.179E-07  |            | 1.004E-06  |            |
|               | Cim_1270 | 0.085  |        | 2.770  | 3.310  | 2.280  | 1.240  | 1.5 |     | 1.1 | 1.1 | 1.1 | 1.5 | 1.250E-07  |            | 3.020E-06  | 3.600E-06  | 2.510E-06  | 1.830E-06  |
| Davos<br>2110 | IL       | 0.0851 | 1.255  | 2.698  | 3.271  | 2.293  | 1.219  | 1.4 | 0.5 | 0.2 | 0.1 | 0.2 | 0.6 | 1.200E-03  | 6.401E-03  | 5.936E-03  | 3.598E-03  | 4.586E-03  | 7.436E-03  |
|               | XIL      | 0.0862 | 1.2612 | 2.7043 | 3.2928 | 2.302  |        | 0.5 | 0.9 | 0.6 | 0.0 | 0.3 |     | 4.5824E-08 | 1.0882E-06 | 1.7002E-06 |            | 7.2490E-07 |            |
|               | PFR      |        |        | 2.734  |        | 2.311  |        |     |     | 0.1 |     | 0.2 |     |            |            | 3.628E-07  |            | 4.713E-07  |            |
| PTB<br>2206   | Lab      | 0.0903 | 1.3225 | 2.9680 | 3.5506 | 2.4146 | 1.2473 | 4.4 | 4.3 | 4.2 | 4.2 | 4.1 | 4.2 | 4.000E-07  | 5.700E-06  | 1.300E-05  | 1.500E-05  | 1.000E-05  | 5.300E-06  |
| Izana<br>2209 | SL       | 0.0855 | 1.2551 | 2.6982 | 3.2715 | 2.2965 | 1.2372 | 2.5 | 1.1 | 0.4 | 0.2 | 0.5 | 0.7 | 2.160E-07  | 1.370E-06  | 1.090E-06  | 5.070E-07  | 1.040E-06  | 8.210E-07  |

Table S1: Solar calibration constants  $V_0$ , percent Coefficients of variation CV, and uncertainties calculated as described from sections 3.1-3.6, for all the methods and periods, for POM\_CNR. When CV or Unc is 0, the monthly dataset is composed by only one point. In column three, there is the type of method used: IL (Improved Langley), XIL (Cross Improved Langley), PFR (Transfer from PFR instrument), Cim\_1270 (Transfer from Cimel), Lab (laboratory calibration), SL (Standard Langley).

| Wymm           | POM_VAL | V0_IL*e-04 (A) |        |        |        |        |        |        |       |     |     | %CV |      |     |            |            |            |            |            |            |            | Unc       |            |            |      |  |  |  |  |  |  |
|----------------|---------|----------------|--------|--------|--------|--------|--------|--------|-------|-----|-----|-----|------|-----|------------|------------|------------|------------|------------|------------|------------|-----------|------------|------------|------|--|--|--|--|--|--|
|                |         | 340            | 400    | 500    | 675    | 870    | 1020   | 340    | 400   | 500 | 675 | 870 | 1020 | 340 | 400        | 500        | 675        | 870        | 1020       | 340        | 400        | 500       | 675        | 870        | 1020 |  |  |  |  |  |  |
| Rome           | 2109    | IL             | 0.0118 | 0.7635 | 2.535  | 3.803  | 2.266  | 2.266  | 1.084 | 2.9 | 2.3 | 0.6 | 0.5  | 0.5 | 0.7        | 3.3859E-08 | 1.7683E-06 | 1.6029E-06 | 2.0540E-06 | 1.0129E-06 | 1.0129E-06 | 2.471E-06 | 2.5904E-06 | 7.5869E-07 |      |  |  |  |  |  |  |
| Rome           | 2109    | Cim_1270       | 0.0124 |        | 2.6149 | 3.8487 | 2.3072 | 1.0580 | 1.2   |     | 1.2 | 1.1 | 1.1  | 1.4 | 1.4        | 1.477E-08  |            | 3.082E-06  | 4.037E-06  |            |            |           |            | 1.516E-06  |      |  |  |  |  |  |  |
| Rome           | 2109    | PFR            |        |        | 2.6153 |        | 2.3130 |        |       |     |     | 1.4 |      |     |            |            |            | 3.6159E-06 |            |            |            |           |            |            |      |  |  |  |  |  |  |
| PTB            | 2206    | Lab            | 0.0123 | 0.7893 | 2.7770 | 3.9341 | 2.3583 | 1.0889 | 4.4   | 4.2 | 4.2 | 4.1 | 4.1  | 4.2 | 5.430E-08  | 3.280E-06  | 1.180E-05  | 1.610E-05  | 9.770E-06  |            |            |           |            | 4.520E-06  |      |  |  |  |  |  |  |
| Vale           | 2210    | IL             | 0.0116 | 0.761  | 2.565  | 3.841  | 2.287  | 1.081  | 1.0   | 0.7 | 1.0 | 1.4 | 1.2  | 1.9 | 1.2027E-08 | 5.0584E-07 | 2.4780E-06 | 5.2583E-06 | 2.8130E-06 |            |            |           |            | 2.0128E-06 |      |  |  |  |  |  |  |
|                |         | XIL            | 0.0117 | 0.7633 | 2.6103 | 3.8144 | 2.2878 | 1.0986 | 3.6   | 7.4 | 6.7 | 2.7 | 2.1  | 7.0 | 4.1569E-08 | 5.6586E-06 | 1.7509E-05 | 1.0429E-05 | 4.7225E-06 |            |            |           |            | 7.6943E-06 |      |  |  |  |  |  |  |
| Vale           | 2211    | IL             | 0.0123 | 0.7804 |        | 3.873  | 2.32   | 1.081  | 1.6   | 2.1 |     |     | 0.5  | 0.7 | 1.7        | 1.9807E-08 | 1.5959E-06 |            | 2.0918E-06 |            |            |           |            | 1.8031E-06 |      |  |  |  |  |  |  |
|                |         | XIL            | 0.0122 | 0.7841 | 2.6006 | 3.8652 | 2.3123 | 1.0574 | 1.2   | 0.0 | 0.2 | 0.4 | 0.5  | 0.0 | 0.0        | 1.4838E-08 | 0.00       | 4.4522E-07 | 1.4502E-06 |            |            |           |            | 0.00       |      |  |  |  |  |  |  |
| Vale/<br>Izana | 2211    | SL_tranf       | 0.0124 | 0.7776 | 2.5673 | 3.8002 | 2.3105 | 1.0753 | 2.6   | 1.1 | 0.4 | 0.3 | 0.5  | 0.7 | 3.2100E-08 | 8.6415E-07 | 1.1423E-06 | 9.9221E-07 | 1.1599E-06 |            |            |           |            | 7.8000E-07 |      |  |  |  |  |  |  |

Table S2: Solar calibration constants  $V_0$ , percent Coefficients of variation CV, and uncertainties calculated as described from sections 3.1-3.6, for all the methods and periods, for POM\_UV. When CV or Unc is 0, the monthly dataset is composed by only one point. In column three, there is the type of method used: IL (Improved Langley), XIL (Cross Improved Langley), PFR (Transfer from PFR instrument), Cim\_1270 (Transfer from Cimel), Lab (laboratory calibration), SL\_tranf (Transfer from POM\_CNR Standard Langley).

|                  |    | SVA *e <sup>-04</sup> (sr) |        |        |        |        |        |        | Unc*e <sup>-04</sup> (sr) |        |        |        |        |        |        |
|------------------|----|----------------------------|--------|--------|--------|--------|--------|--------|---------------------------|--------|--------|--------|--------|--------|--------|
|                  |    | 340                        | 400    | 500    | 675    | 870    | 940    | 1020   | 340                       | 400    | 500    | 675    | 870    | 940    | 1020   |
| POM_CNR AALTO    |    | 2.666                      | 2.464  | 2.424  | 2.430  | 2.418  | 2.532  | 2.503  | /                         | /      | /      | /      | /      | /      | /      |
| POM_VAL PMOD     |    | 2.198                      | 2.298  | 2.302  | 2.343  | 2.396  | 2.433  | 2.382  | 0.016                     | 0.011  | 0.009  | 0.012  | 0.012  | 0.009  | 0.011  |
| POM_CNR ROME     | 3m | 2.4223                     | 2.4633 | 2.4713 | 2.4588 | 2.5018 | 2.5038 | 2.5128 | 0.0144                    | 0.0171 | 0.0190 | 0.0070 | 0.0056 | 0.0072 | 0.0090 |
|                  | 3n | 2.4363                     | 2.4770 | 2.4825 | 2.4713 | 2.5255 | 2.5383 | 2.5425 | 0.0139                    | 0.0171 | 0.0182 | 0.0071 | 0.0042 | 0.0063 | 0.0075 |
| POM_CNR IZANA    | 3m | 2.3750                     | 2.4370 | 2.4470 | 2.4382 | 2.4682 | 2.4882 | 2.4973 | 0.0680                    | 0.0119 | 0.0084 | 0.0109 | 0.0507 | 0.0193 | 0.0196 |
|                  | 3n | 2.3813                     | 2.4452 | 2.4538 | 2.4482 | 2.4798 | 2.5183 | 2.5258 | 0.0677                    | 0.0122 | 0.0085 | 0.0124 | 0.0565 | 0.0196 | 0.0210 |
| POM_VAL VALENCIA | 3m | 2.2528                     | 2.3110 | 2.3368 | 2.3598 | 2.3923 | 2.4530 | 2.3910 | 0.0107                    | 0.0143 | 0.0224 | 0.0222 | 0.0293 | 0.0197 | 0.0199 |
|                  | 3n | 2.2645                     | 2.3180 | 2.3468 | 2.3708 | 2.4463 | 2.5040 | 2.4220 | 0.0090                    | 0.0154 | 0.0222 | 0.0235 | 0.0309 | 0.0170 | 0.0217 |
| POM_VAL ROME     | 3m | 2.3080                     | 2.3585 | 2.3625 | 2.3885 | 2.4770 | 2.5460 | 2.4720 | 0.0368                    | 0.0092 | 0.0361 | 0.0396 | 0.0120 | 0.0410 | 0.0269 |
|                  | 3n | 2.2910                     | 2.3475 | 2.3505 | 2.3770 | 2.4215 | 2.4940 | 2.4410 | 0.0438                    | 0.0120 | 0.0389 | 0.0417 | 0.0170 | 0.0311 | 0.0240 |

Table S3. SVA values and their uncertainties, obtained by laboratory calibrations and solar disk scanning methods.

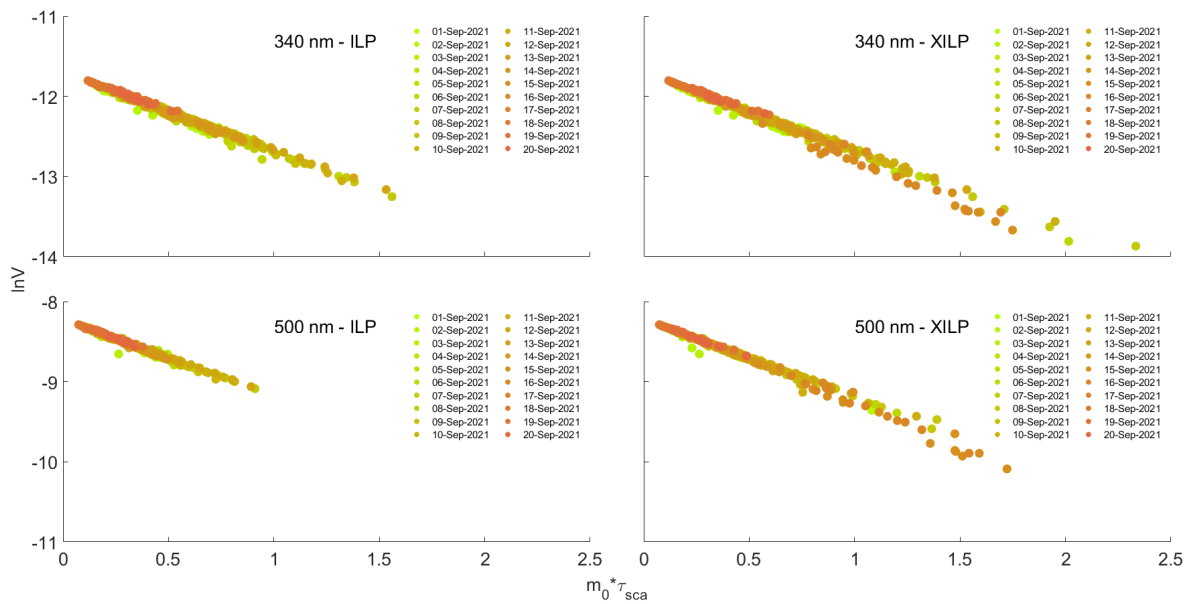

Figure S1: Improved Langley (ILP; left) and Cross Improved Langley plots (XILP; right) in Rome at 340 nm and 500 nm;

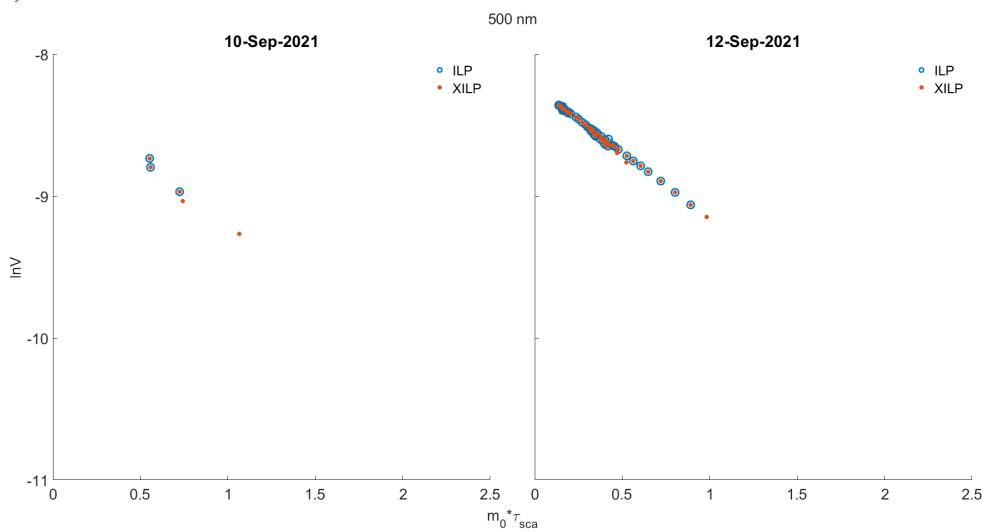

Figure S2: Worst and best cases of ILP and XILP selected from Figure S4.
